# Supplementary material
Source: publisher site journal article supplement (https://www.dovepress.com/article/364994)
Supplement: Supplementary file 1 [file get_supplementary_file.php]

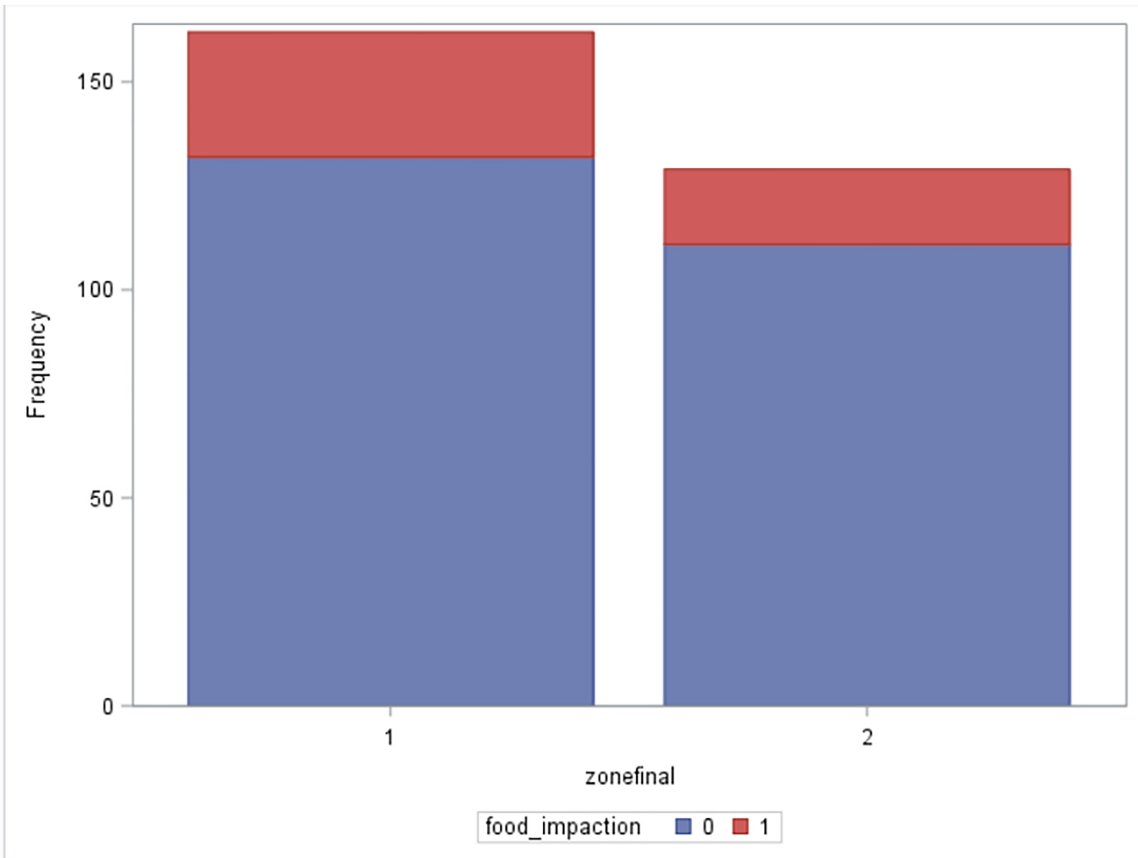

**Supplementary Figure:** Food impact frequency in high income patients (column 1) versus low income patients (column 2).
